# Supplementary material for: Molecular transitions in early progenitors during human cord blood hematopoiesis
Source: PubMed Central journal article supplement (PMC5852373; doi:10.15252/msb.20178041), 2018-03-15
Supplement: MSB-14-e8041-s005.pdf [file MSB-14-e8041-s005.pdf]

## Molecular transitions in early progenitors during human cord blood hematopoiesis

Shiwei Zheng, Efthymia Papalexi, Andrew Butler, William Stephenson and Rahul Satija

---

### Review timeline:

|                     |                  |
|---------------------|------------------|
| Submission date:    | 9 October 2017   |
| Editorial Decision: | 18 February 2018 |
| Revision received:  | 7 February 2018  |
| Accepted:           | 12 February 2018 |

---

Editor: Maria Polychronidou

### Transaction Report:

(Note: With the exception of the correction of typographical or spelling errors that could be a source of ambiguity, letters and reports are not edited. The original formatting of letters and referee reports may not be reflected in this compilation.)

---

1st Editorial Decision

18 February 2018

Thank you again for submitting your work to Molecular Systems Biology. We have now heard back from the two referees who agreed to evaluate your study. As you will see below, the reviewers are overall quite positive and think that the findings seem interesting. They raise however a series of concerns, which we would ask you to address in a revision of the manuscript.

The reviewers' recommendations are rather clear and therefore I think that there is no need to repeat all the points listed below. Please let me know in case you would like to discuss any of the issues raised by the reviewers.

-----  
REVIEWER REPORTS

Reviewer #1:

In this paper the authors apply large-scale scRNA-seq profiling based on Drop-seq to characterize the transcriptional diversity and lineages identified in CD34+ human cord blood cells. Overall, this study is interesting and unique in scale and approach. The analysis of primary cord blood from multiple donors represents a significant advance and complements previous analyses of lineages in human bone marrow. My concerns are two-fold.

First, the authors should work on the text to clearly mark and highlight novel findings and insights derived. As presented, the analysis feels fairly descriptive and mostly confirmatory. Second, I have some technical concerns and comments that require additional analyses.

Specific comments:

1. Robustness of the clustering & outlying cells.

Due to the central use of the clustering step, it would be helpful to confirm the determined clustering using alternative strategies and methods. I would also be interested to see more data about the outlying cells that are discarded. Can these cells be aligned to intermediates states in the reconstructed graphs or these truly rare / low quality / noise ?

2. Biological relevance and completeness of the identified micro clusters.

The authors make the interesting remark that the variation within these clusters is consistent with Poisson noise. I would suggest to stress this message, but also add additional controls to clarify whether the N~900 micro clusters do indeed represent the transcriptional complexity of the system. In particular, because transcriptome profiles have been used to define the clusters, there is the risk of overfitting. To address this, I would suggest a hold-out procedure, thereby demonstrating that genes that were excluded during the definition of clusters retain Poisson-like variability between cells within the clusters.

3. Extension of the transcription factor motif analysis.

The motif analysis for genes in distinct modules across lineages (page 9) is interesting and offers the opportunity to obtain mechanistic insights. I would suggest to extend this analysis. For example, it would be interesting to understand whether motifs are predictive of fine-grained differences of trajectories for individual genes, e.g. using known targets of TFs.

4. Technical controls for the bone marrow data integration.

The integration of scRNA-seq from this study with existing data from bone marrow is interesting. As these alignment methods are still a fairly recent development, I would request additional technical controls to show that the (impressive!) agreement between studies is not the results of overfitting. E.g. can the method be run in hold out manner, using on a subset of cells and/or genes, to confirm the robustness of the mapping between studies?

5. ATAC-se integration.

This is the most descriptive part of the paper and I find the insights appear to be rather slim. It would be helpful to work out any messages more clearly. From my perspective the section could also be toned down/dropped.

Reviewer #2:

Zheng et al report the generation and comprehensive analysis of a single cell gene expression dataset for human cord blood CD34 positive cells, which comprises a broad stem/progenitor mix of human blood cells. The authors identify 4 distinct "endpoints" of maturing cells, reveal intermediate differentiation stages that show evidence of multi-lineage priming, explore the relationship between chromatin state and "transcriptomic differentiation state", and carry out single cell functional assays that exploit - and then validate - predicted heterogeneity within the putative LMPP compartment. The study is on the whole well executed, and the conclusions supported by the data. However, there are a few specific areas where the paper could be improved, as outlined below:

Specific Comments

1) I would argue that the potential impact of this paper could be greatly enhanced if the authors provide a user-friendly website that would allow the wider scientific community to explore and download the data. I am not asking for a website that would run analysis, just something simple as was provided for the Nestorowa mouse scRNA-Seq paper that they cite. In addition, I could also not see a link to accession numbers in the main document, which would need to be provided too.

2) Page 4: The authors provide the number of UMIs per cell, but should also state here the number of detected genes per cell. This is important bit of information for the community, when reading a given paper, and thinking about how datasets relate to each other.

3) Still page 4: The authors should also say something here about the expected rate of doublets, and whether or not they have done something bioinformatically to lessen their impact on subsequent data analysis.

4) Page 6: The authors need to justify why mini clusters of 20 cells is a good number. What happens with 10 cells, what happens with 25 or 50 cells?

5) Still about the miniclusters: Does the minicluster analysis in some sense mean that the dataset shrinks from 20,000 to 1,000 entities? Because this is in the same range of cells analysed by the Velten et al paper by the deeper-sequencing scRNA-Seq method.

6) Why does the diffusion map in figure 2D not reveal the 4 endpoints? Would they be seen when looking at further dimensions? It may be worth commenting on this. And more generally, whether the tree hierarchy was also seen when using alternative methods of data analysis (there are quite a few now for finding branched differentiation trajectories in single cell data).

Minor Points:

1) Page 1: Although the term "pluripotent" used to be widely used for HSCs (and of course when translated into English does capture what they do), it is these days almost exclusively used for embryonic stem cells. Would be better therefore to use multipotent.

2) Figure 2B/D: It would be good to remove the black outlines of the circles, and then use colors to differentiate high/low expression. I had to zoom in really high on my computer to see the expression in panel D.

We appreciate the positive comments from the two peer reviewers, and were gratified to see their enthusiasm for our work. We recognize that both of the reviewers had additional questions regarding the robustness and reproducibility of some of our approaches. We have revised our manuscript in line with these concerns, and describe our modifications in the response below. We believe that these have strengthened the overall work, and thank the reviewers for their constructive comments.

**Reviewer #1:** In this paper the authors apply large-scale scRNA-seq profiling based on Drop-seq to characterize the transcriptional diversity and lineages identified in CD34+ human cord blood cells. Overall, this study is interesting and unique in scale and approach. The analysis of primary cord blood from multiple donors represents a significant advance and complements previous analyses of lineages in human bone marrow. My concerns are two-fold. First, the authors should work on the text to clearly mark and highlight novel findings and insights derived. As presented, the analysis feels fairly descriptive and mostly confirmatory. Second, I have some technical concerns and comments that require additional analyses.

We thank the reviewer for these constructive comments, which we address below.

Specific comments:

1. **Robustness of the clustering & outlying cells.** Due to the central use of the clustering step, it would be helpful to confirm the determined clustering using alternative strategies and methods. I would also be interested to see more data about the outlying cells that are discarded. Can these cells be aligned to intermediates states in the reconstructed graphs or these truly rare / low quality / noise?

We agree with the reviewer that the robustness of our clustering is an important area to explore further. Our approach of dimensional reduction followed by graph-based clustering is the most widely used clustering approach in the field, but in our revised manuscript, we asked whether our results were not dependent on specific key parameters that can alter the results. To address this, we conducted a robustness analysis of our clustering results, where we ran the clustering over a range of values for two key parameters: the number of nearest neighbors, and the clustering resolution/granularity. Overall, we ran 25 different clustering, and combined the results into a consensus clustering matrix, which allowed us to calculate how often each pair of cells clustered together across the 25 re-clusterings.

We observed that cell pairs that clustered together in the original analysis tended to cluster together in the >80% of the re-clusterings. This was particularly striking for the more differentiated cells (across the four 'endpoints' clusters), where this frequency was 92%, as the boundaries are more clearly defined between cell states as expected. We conclude that our original clustering is a faithful representation of

the data and is not tuned to particular parameter values. We thank the reviewer for this suggestion, and include these analyses in Extended View Figure 1C.

The reviewer also asked for further clarification of the rare cells that we excluded from downstream analysis. As shown in Extended View Figure 1B, these clusters were highly enriched for mRNA markers that are canonically associated with differentiated cell markers, including CD3D (T cells), MS4A1 (B cells), and C5AR1 (neutrophils). Additionally, these cells were depleted of transcripts for stem cell/progenitor markers (for example, *GATA2*, *KIT*, *FLT3* or *CSF3R*). Taken together, we are confident that the outlying cells are not intermediate states in the reconstructed trajectories, but are likely CD34<sup>-/low</sup> cells that inadvertently passed through column purification, and should therefore be excluded from downstream analyses.

2. Biological relevance and completeness of the identified micro clusters. The authors make the interesting remark that the variation within these clusters is consistent with Poisson noise. I would suggest to stress this message, but also add additional controls to clarify whether the N~900 micro clusters do indeed represent the transcriptional complexity of the system. In particular, because transcriptome profiles have been used to define the clusters, there is the risk of overfitting. To address this, I would suggest a hold-out procedure, thereby demonstrating that genes that were excluded during the definition of clusters retain Poisson-like variability between cells within the clusters.

We agree with the reviewer and have slightly expanded this section, with two new analyses. First, we examined all 31,289 genes that were not included in our clustering ('hold-out' analysis), and examined their variation levels. These analyses are shown in Extended View Figure 2B, and we conclude that even genes that were not involved in clustering also exhibit Poisson noise between single cells in a micro-cluster. Second, we justify our choice of n = 20 for pooling micro-clusters with a saturation analysis shown in Extended View Figure 2. Larger values of n introduce additional smoothing, but with diminishing returns, and creating a risk of blurring biological distinctions. Together, these analyses address the reviewer's concerns about potential overfitting.

3. Extension of the transcription factor motif analysis. The motif analysis for genes in distinct modules across lineages (page 9) is interesting and offers the opportunity to obtain mechanistic insights. I would suggest to extend this analysis. For example, it would be interesting to understand whether motifs are predictive of fine-grained differences of trajectories for individual genes, e.g. using known targets of TFs.

5. ATAC-seq integration. This is the most descriptive part of the paper and I find the insights appear to be rather slim. It would be helpful to work out any messages more clearly. From my perspective the section could also be toned down/dropped.

We thank the reviewer for the constructive comments. We realized that the ATAC-seq data presented an opportunity to extend the motif analyses, as the reviewer suggests, to better understand how differences in motif content correlate with transcriptional dynamics. The analyses presented in our initial manuscript focused only on the global chromatin dynamics of each gene, a summary of each gene's accessibility that considered the effect of only a single accessible region for each gene.

In our revised manuscript, we have included a broader investigation on the full dataset with all the open accessible regions detected. This revealed a set of intriguing peaks, which we deem 'inconsistent' peaks, that exhibit opposing accessibility dynamics compared to the transcriptional output of the nearest gene. These peaks are decidedly in the minority (~15% of all peaks), and contain strikingly different motif enrichments compared to "consistent" peaks, despite being located upstream of the same genes. This is clearly exhibited with an example at the CSF3R promoter in Figure 4H, alongside additional downstream analysis in Figure 4I and Extended View Figure 4.

We were surprised by this degree of heterogeneity in chromatin accessibility dynamics in a single promoter. While we emphasize that these inconsistent peaks are in the minority, and may have no function on transcriptional output, they could also represent intriguing cases of "cross-antagonism". In this case, these peaks potentially serve as repressive binding sites, keeping genes repressed after down-regulation. While such examples have been reported anecdotally for ETS and GATA binding factors, repressive regions are expected to play important roles across the transcriptome, consistent with our findings here.

Due to the extreme technical challenge of manipulating or perturbing regulatory regions in primary human hematopoietic cells, this analysis remains descriptive. However, we believe that the identification of these regions, along with a detailed description of their motif content, represents a potentially valuable insight that can result from the integration of scRNA-seq and ATAC-seq data.

4. Technical controls for the bone marrow data integration. The integration of scRNA-seq from this study with existing data from bone marrow is interesting. As these alignment methods are still a fairly recent development, I would request additional technical controls to show that the (impressive!) agreement between studies is not the results of overfitting. E.g. can the method be run in hold out manner, using on a subset of cells and/or genes, to confirm the robustness of the mapping between studies?

We appreciated that the reviewer found these analyses interesting and agreed that their robustness could be further explored. To address this concern, we performed a repeated subsampling analysis, where we sampled 500 cells from the bone marrow dataset, and aligned them to the cord blood micro-clusters as we did with the full

Velten dataset. Visualized as a 'confusion matrix' in Extended View Figure 4, we found that the alignment results are consistent between the 500-cell subset (median consistency 'on-diagonal' of 0.70) and all bone marrow cells, as shown in the consensus matrix from Extended View Figure 4E. In the cases where we observed differences, this was largely driven by blurred cell state boundaries in early intermediate states (for example, the exact cutoff between HSC/LMPP), as would be expected for imposing clustering onto a continuous process. As expected, we also observed higher values for 'endpoint' clusters (median consistency 0.85). Again, this addresses the possible concern for overfitting, and we thank the reviewer for this suggestion.

**Reviewer #2:** Zheng et al report the generation and comprehensive analysis of a single cell gene expression dataset for human cord blood CD34 positive cells, which comprises a broad stem/progenitor mix of human blood cells. The authors identify 4 distinct "endpoints" of maturing cells, reveal intermediate differentiation stages that show evidence of multi-lineage priming, explore the relationship between chromatin state and "transcriptomic differentiation state", and carry out single cell functional assays that exploit - and then validate - predicted heterogeneity within the putative LMPP compartment. The study is on the whole well executed, and the conclusions supported by the data. However, there are a few specific areas where the paper could be improved, as outlined below:

**Specific Comments** 1) I would argue that the potential impact of this paper could be greatly enhanced if the authors provide a user-friendly website that would allow the wider scientific community to explore and download the data. I am not asking for a website that would run analysis, just something simple as was provided for the Nestorowa mouse scRNA-Seq paper that they cite. In addition, I could also not see a link to accession numbers in the main document, which would need to be provided too.

We have created a webpage, based on an R 'Shiny' app, to help visualize gene expression in our reconstructed trajectories. This is openly and freely available at : <http://www.satijalab.org/cd34/>. In addition, the app allows for the visualization of the integrated bone marrow and cord blood datasets, as well as gene expression levels in the Laurenti et al. microarray dataset. Lastly, our data is uploaded to NCBI Geo with the accession number of GSE97104, and the token for reviewer access is 'evedicoslnyrdeh'. We have listed these resources in a 'data availability' section at the end of the manuscript.

2) Page 4: The authors provide the number of UMIs per cell, but should also state here the number of detected genes per cell. This is important bit of information for the community, when reading a given paper, and thinking about how datasets relate to each other.

We agree and thank the reviewer for the suggestion, and have included this information in the main text (1,046 genes detected per cell, 6,858 genes per micro-cluster on average).

3) Still page 4: The authors should also say something here about the expected rate of doublets, and whether or not they have done something bioinformatically to lessen their impact on subsequent data analysis.

We appreciate the reviewer's suggestion – especially as doublet states could appear to represent intermediate populations in our data. This concern is primarily relevant for extremely rare intermediates.

In our optimization of the Drop-seq technology, we chose to use cell and microparticle flow rates that yielded expected doublet rates of 1-2%. Therefore, if there were intermediate populations of this rarity in the data, we would agree with the reviewer's concern. However, given the abundance of intermediate clusters (ranging from 18-23%), we are fully confident that these clusters cannot be a byproduct of cell doublets.

While we could choose to exclude cells with higher numbers of UMIs as putative doublets, we worried that we may introduce bias against larger cells into our downstream analyses. Therefore, we chose to keep with existing analysis in the field (including Velten et al., Paul et al., and Nestorowa et al.) and not attempt to bioinformatically detect and remove doublets.

We thank for reviewer for raising this, and have now included our expected doublet rate in the main text and Materials and Methods.

4) Page 6: The authors need to justify why mini clusters of 20 cells is a good number. What happens with 10 cells, what happens with 25 or 50 cells?

We appreciate the reviewer's concern and have provided additional analysis shown in Extended View Figure 2D. As suggested, we varied the number of cells pooled together in microclusters, and computed downstream technical metrics to justify our choice of  $n = 20$ . In particular, computed the correlation and covariance between two neighboring micro-clusters after the averaging. As we show in the new Figure, the correlation values increase and eventually reach a saturation as more single cells are included in one micro-cluster, indicating the increasing degree of smoothness for our dataset, while  $>0.9$  correlation is reached when  $n = 20$ . Meanwhile, the covariance between two nearest neighbors starts to drop as more cells are included, which suggests a decrease on resolution. Therefore, we chose  $n = 20$  to reach a balance between smoothness and resolution. We note that we obtain the same global biological hierarchies with slightly different values of  $n$ , but hope that these new analyses justify our choice of this parameter.



5) Still about the miniclusters: Does the minicluster analysis in some sense mean that the dataset shrinks from 20,000 to 1,000 entities? Because this is in the same range of cells analysed by the Velten et al paper by the deeper-sequencing scRNA-Seq method.

Indeed, as the reviewer suggests, performing micro-clustering does reduce the number of cells in our data. However, we gain a significant boost in sensitivity, even compared to deep single cell RNA-seq technologies, as applied in the Velten et al. Manuscript. In particular, we have observed a striking increase in detected genes/cell per microcluster (6,858 genes per micro-cluster, compared with 3,758 genes from the Velten et al. manuscript). The increase in gene numbers help us better identify the top enriched markers for each progenitor states, as visualized from the side-by-side heatmaps in Figure 4C.

6) Why does the diffusion map in figure 2D not reveal the 4 endpoints? Would they be seen when looking at further dimensions? It may be worth commenting on this. And more generally, whether the tree hierarchy was also seen when using alternative methods of data analysis (there are quite a few now for finding branched differentiation trajectories in single cell data).

We apologize for the confusion; Figure 2D does in fact reveal all four endpoints, and the layout in Figure 2D is identical to Figure 2B, which contains the annotation for each progenitor state. The four endpoints are those labeled as 'Ba/Eo/Ma', 'Er', 'Neu/Mo' and 'Lym'. We have added the explanation in the figure legend.

We also agree that our observed hierarchy should be reproducible with other tools analyzing single cell trajectories. To address this, we have run Monocle on our micro-clusters. As shown in Extended View Figure 2H, Monocle reveals the same tree hierarchy with four 'endpoints' – Ba/Eo/Ma, Er, Neu/Mo and Lym. We therefore conclude that similar biological results can be obtained by running multiple analytical tools.

Minor Points: 1) Page 1: Although the term "pluripotent" used to be widely used for HSCs (and of course when translated into English does capture what they do), it is these days almost exclusively used for embryonic stem cells. Would be better therefore to use multipotent.

2) Figure 2B/D: It would be good to remove the black outlines of the circles, and then use colors to differentiate high/low expression. I had to zoom in really high on my computer to see the expression in panel D.

We have made these modifications as requested.

Thank you for sending us your revised manuscript. We are now satisfied with the modifications made and I am pleased to inform you that your paper has been accepted for publication.

YOU MUST COMPLETE ALL CELLS WITH A PINK BACKGROUND ↓

PLEASE NOTE THAT THIS CHECKLIST WILL BE PUBLISHED ALONGSIDE YOUR PAPER

Corresponding Author Name: Rahul Satija

Journal Submitted to: Molecular Systems Biology

Manuscript Number: MSB-17-8041

**Reporting Checklist For Life Sciences Articles (Rev. July 2015)**

This checklist is used to ensure good reporting standards and to improve the reproducibility of published results. These guidelines are consistent with the Principles and Guidelines for Reporting Preclinical Research issued by the NIH in 2014. Please follow the journal's authorship guidelines in preparing your manuscript.

**A- Figures****1. Data****The data shown in figures should satisfy the following conditions:**

- the data were obtained and processed according to the field's best practice and are presented to reflect the results of the experiments in an accurate and unbiased manner.
- figure panels include only data points, measurements or observations that can be compared to each other in a scientifically meaningful way.
- graphs include clearly labeled error bars for independent experiments and sample sizes. Unless justified, error bars should not be shown for technical replicates.
- if  $n < 5$ , the individual data points from each experiment should be plotted and any statistical test employed should be justified
- Source Data should be included to report the data underlying graphs. Please follow the guidelines set out in the author ship guidelines on Data Presentation.

**2. Captions****Each figure caption should contain the following information, for each panel where they are relevant:**

- a specification of the experimental system investigated (eg cell line, species name).
- the assay(s) and method(s) used to carry out the reported observations and measurements
- an explicit mention of the biological and chemical entity(ies) that are being measured.
- an explicit mention of the biological and chemical entity(ies) that are altered/varied/perturbed in a controlled manner.
- the exact sample size (n) for each experimental group/condition, given as a number, not a range;
- a description of the sample collection allowing the reader to understand whether the samples represent technical or biological replicates (including how many animals, litters, cultures, etc.).
- a statement of how many times the experiment shown was independently replicated in the laboratory.
- definitions of statistical methods and measures:
  - common tests, such as t-test (please specify whether paired vs. unpaired), simple  $\chi^2$  tests, Wilcoxon and Mann-Whitney tests, can be unambiguously identified by name only, but more complex techniques should be described in the methods section;
  - are tests one-sided or two-sided?
  - are there adjustments for multiple comparisons?
  - exact statistical test results, e.g., P values = x but not P values < x;
  - definition of 'center values' as median or average;
  - definition of error bars as s.d. or s.e.m.

Any descriptions too long for the figure legend should be included in the methods section and/or with the source data.

Please ensure that the answers to the following questions are reported in the manuscript itself. We encourage you to include a specific subsection in the methods section for statistics, reagents, animal models and human subjects.

In the pink boxes below, provide the page number(s) of the manuscript draft or figure legend(s) where the information can be located. Every question should be answered. If the question is not relevant to your research, please write NA (non applicable).

**B- Statistics and general methods**

Please fill out these boxes ↓ (Do not worry if you cannot see all your text once you press return)

|                                                                                                                                                                                         |                  |
|-----------------------------------------------------------------------------------------------------------------------------------------------------------------------------------------|------------------|
| 1.a. How was the sample size chosen to ensure adequate power to detect a pre-specified effect size?                                                                                     | Page 4           |
| 1.b. For animal studies, include a statement about sample size estimate even if no statistical methods were used.                                                                       | NA               |
| 2. Describe inclusion/exclusion criteria if samples or animals were excluded from the analysis. Were the criteria pre-established?                                                      | NA               |
| 3. Were any steps taken to minimize the effects of subjective bias when allocating animals/samples to treatment (e.g. randomization procedure)? If yes, please describe.                | NA               |
| For animal studies, include a statement about randomization even if no randomization was used.                                                                                          | NA               |
| 4.a. Were any steps taken to minimize the effects of subjective bias during group allocation or/and when assessing results (e.g. blinding of the investigator)? If yes please describe. | NA               |
| 4.b. For animal studies, include a statement about blinding even if no blinding was done                                                                                                | NA               |
| 5. For every figure, are statistical tests justified as appropriate?                                                                                                                    | Yes              |
| Do the data meet the assumptions of the tests (e.g., normal distribution)? Describe any methods used to assess it.                                                                      | Page 42          |
| Is there an estimate of variation within each group of data?                                                                                                                            | Page 41, Page 45 |
| Is the variance similar between the groups that are being statistically compared?                                                                                                       | Page 41, Page 45 |

**C- Reagents****USEFUL LINKS FOR COMPLETING THIS FORM**

<http://www.antibodypedia.com>  
<http://1degreebio.org>  
<http://www.equator-network.org/reporting-guidelines/improving-bioscience-research-repo>

<http://grants.nih.gov/grants/olaw/olaw.htm>  
<http://www.mrc.ac.uk/Ourresearch/Ethicsresearchguidance/Useofanimals/index.htm>  
<http://ClinicalTrials.gov>  
<http://www.consort-statement.org>  
<http://www.consort-statement.org/checklists/view/32-consort/66-title>

<http://www.equator-network.org/reporting-guidelines/reporting-recommendations-for-tun>

<http://datadryad.org>

<http://figshare.com>

<http://www.ncbi.nlm.nih.gov/gap>

<http://www.ebi.ac.uk/ega>

<http://biomodels.net/>

<http://biomodels.net/miriam/>

<http://ijb.biochem.sun.ac.za>

[http://oba.od.nih.gov/biosecurity/biosecurity\\_documents.html](http://oba.od.nih.gov/biosecurity/biosecurity_documents.html)

<http://www.selectagents.gov/>

|                                                                                                                                                                                                                                                                                                                                                                  |                           |
|------------------------------------------------------------------------------------------------------------------------------------------------------------------------------------------------------------------------------------------------------------------------------------------------------------------------------------------------------------------|---------------------------|
| 6. To show that antibodies were profiled for use in the system under study (assay and species), provide a citation, catalog number and/or clone number, supplementary information or reference to an antibody validation profile. e.g., Antibodypedia ( <a href="#">see link list at top right</a> ), 1DegreeBio ( <a href="#">see link list at top right</a> ). | Page 17, Page 18, Page 30 |
| 7. Identify the source of cell lines and report if they were recently authenticated (e.g., by STR profiling) and tested for mycoplasma contamination.                                                                                                                                                                                                            | Page 17                   |

\* for all hyperlinks, please see the table at the top right of the document

#### D- Animal Models

|                                                                                                                                                                                                                                                                                                                                                                                                                                          |    |
|------------------------------------------------------------------------------------------------------------------------------------------------------------------------------------------------------------------------------------------------------------------------------------------------------------------------------------------------------------------------------------------------------------------------------------------|----|
| 8. Report species, strain, gender, age of animals and genetic modification status where applicable. Please detail housing and husbandry conditions and the source of animals.                                                                                                                                                                                                                                                            | NA |
| 9. For experiments involving live vertebrates, include a statement of compliance with ethical regulations and identify the committee(s) approving the experiments.                                                                                                                                                                                                                                                                       | NA |
| 10. We recommend consulting the ARRIVE guidelines ( <a href="#">see link list at top right</a> ) (PLoS Biol. 8(6), e1000412, 2010) to ensure that other relevant aspects of animal studies are adequately reported. See author guidelines, under 'Reporting Guidelines'. See also: NIH ( <a href="#">see link list at top right</a> ) and MRC ( <a href="#">see link list at top right</a> ) recommendations. Please confirm compliance. | NA |

#### E- Human Subjects

|                                                                                                                                                                                                                                                                                                                                                        |    |
|--------------------------------------------------------------------------------------------------------------------------------------------------------------------------------------------------------------------------------------------------------------------------------------------------------------------------------------------------------|----|
| 11. Identify the committee(s) approving the study protocol.                                                                                                                                                                                                                                                                                            | NA |
| 12. Include a statement confirming that informed consent was obtained from all subjects and that the experiments conformed to the principles set out in the WMA Declaration of Helsinki and the Department of Health and Human Services Belmont Report.                                                                                                | NA |
| 13. For publication of patient photos, include a statement confirming that consent to publish was obtained.                                                                                                                                                                                                                                            | NA |
| 14. Report any restrictions on the availability (and/or on the use) of human data or samples.                                                                                                                                                                                                                                                          | NA |
| 15. Report the clinical trial registration number (at ClinicalTrials.gov or equivalent), where applicable.                                                                                                                                                                                                                                             | NA |
| 16. For phase II and III randomized controlled trials, please refer to the CONSORT flow diagram ( <a href="#">see link list at top right</a> ) and submit the CONSORT checklist ( <a href="#">see link list at top right</a> ) with your submission. See author guidelines, under 'Reporting Guidelines'. Please confirm you have submitted this list. | NA |
| 17. For tumor marker prognostic studies, we recommend that you follow the REMARK reporting guidelines ( <a href="#">see link list at top right</a> ). See author guidelines, under 'Reporting Guidelines'. Please confirm you have followed these guidelines.                                                                                          | NA |

#### F- Data Accessibility

|                                                                                                                                                                                                                                                                                                                                                                                                                                                                                                                                                                                                                                                                                                                                                         |                                                                                                                                                                          |
|---------------------------------------------------------------------------------------------------------------------------------------------------------------------------------------------------------------------------------------------------------------------------------------------------------------------------------------------------------------------------------------------------------------------------------------------------------------------------------------------------------------------------------------------------------------------------------------------------------------------------------------------------------------------------------------------------------------------------------------------------------|--------------------------------------------------------------------------------------------------------------------------------------------------------------------------|
| 18. Provide accession codes for deposited data. See author guidelines, under 'Data Deposition'.<br>Data deposition in a public repository is mandatory for:<br>a. Protein, DNA and RNA sequences<br>b. Macromolecular structures<br>c. Crystallographic data for small molecules<br>d. Functional genomics data<br>e. Proteomics and molecular interactions                                                                                                                                                                                                                                                                                                                                                                                             | Page 30                                                                                                                                                                  |
| 19. Deposition is strongly recommended for any datasets that are central and integral to the study; please consider the journal's data policy. If no structured public repository exists for a given data type, we encourage the provision of datasets in the manuscript as a Supplementary Document ( <a href="#">see author guidelines under 'Expanded View'</a> ) or in unstructured repositories such as Dryad ( <a href="#">see link list at top right</a> ) or Figshare ( <a href="#">see link list at top right</a> ).                                                                                                                                                                                                                           | Page 30                                                                                                                                                                  |
| 20. Access to human clinical and genomic datasets should be provided with as few restrictions as possible while respecting ethical obligations to the patients and relevant medical and legal issues. If practically possible and compatible with the individual consent agreement used in the study, such data should be deposited in one of the major public access-controlled repositories such as dbGAP ( <a href="#">see link list at top right</a> ) or EGA ( <a href="#">see link list at top right</a> ).                                                                                                                                                                                                                                       | Page 30                                                                                                                                                                  |
| 21. As far as possible, primary and referenced data should be formally cited in a Data Availability section. Please state whether you have included this section.<br><br>Examples:<br><b>Primary Data</b><br>Wetmore KM, Deutschbauer AM, Price MN, Arkin AP (2012). Comparison of gene expression and mutant fitness in <i>Shewanella oneidensis</i> MR-1. Gene Expression Omnibus GSE39462<br><b>Referenced Data</b><br>Huang J, Brown AF, Lei M (2012). Crystal structure of the TRBD domain of TERT and the CR4/5 of TR. Protein Data Bank 4O26<br>AP-MS analysis of human histone deacetylase interactions in CEM-T cells (2013). PRIDE PXD000208                                                                                                  | We have included this section                                                                                                                                            |
| 22. Computational models that are central and integral to a study should be shared without restrictions and provided in a machine-readable form. The relevant accession numbers or links should be provided. When possible, standardized format (SBML, CellML) should be used instead of scripts (e.g. MATLAB). Authors are strongly encouraged to follow the MIRIAM guidelines ( <a href="#">see link list at top right</a> ) and deposit their model in a public database such as Biocompare ( <a href="#">see link list at top right</a> ) or JWS Online ( <a href="#">see link list at top right</a> ). If computer source code is provided with the paper, it should be deposited in a public repository or included in supplementary information. | <a href="http://bit.ly/1at1a9b">http://bit.ly/1at1a9b</a> or <a href="http://dx.doi.org/10.26434/chemrxiv-2014-03-01">http://dx.doi.org/10.26434/chemrxiv-2014-03-01</a> |

#### G- Dual use research of concern

|                                                                                                                                                                                                                                                                                                                                   |    |
|-----------------------------------------------------------------------------------------------------------------------------------------------------------------------------------------------------------------------------------------------------------------------------------------------------------------------------------|----|
| 23. Could your study fall under dual use research restrictions? Please check biosecurity documents ( <a href="#">see link list at top right</a> ) and list of select agents and toxins (APHIS/CDC) ( <a href="#">see link list at top right</a> ). According to our biosecurity guidelines, provide a statement only if it could. | NA |
|-----------------------------------------------------------------------------------------------------------------------------------------------------------------------------------------------------------------------------------------------------------------------------------------------------------------------------------|----|
